# Supplementary material
Source: publisher figshare collection journal article supplement (https://acs.figshare.com/ndownloader/files/14653082)
Supplement: Supplementary file 1 [file 14653082]

# Supplementary Figure S1

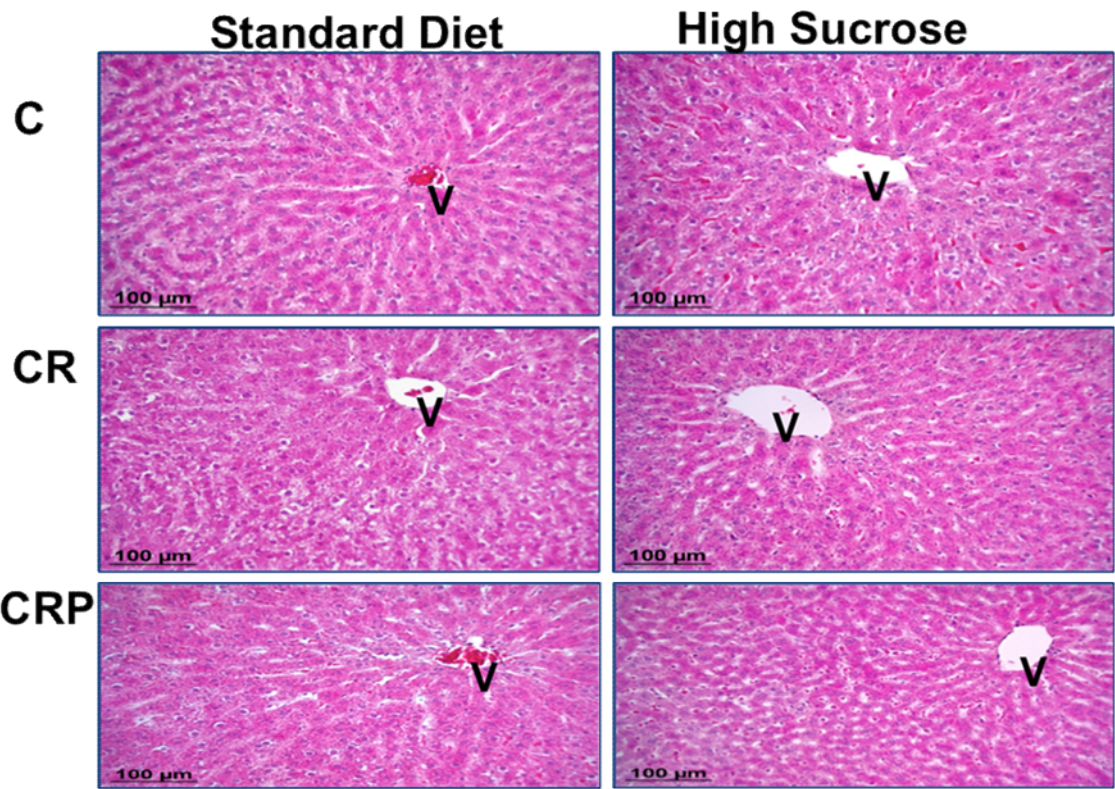

**Figure S1:** Representative liver slides stained with hematoxylin/eosin (x20) of C, CR and CRP groups under SD or HS diet at 6 months of age. V, indicates central vein.
